# Supplementary material for: Cas9-Assisted Targeting of CHromosome segments CATCH enables one-step targeted cloning of large gene clusters
Source: PubMed Central journal article supplement (PMC4569707; doi:10.1038/ncomms9101), 2015-09-01
Supplement: ncomms9101-s1.pdf [file ncomms9101-s1.pdf]

## Supplementary Figures

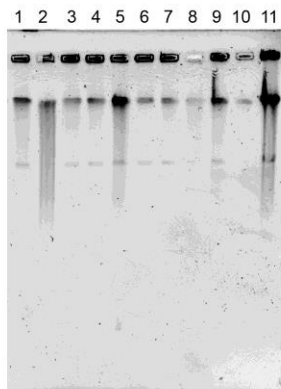

| Lane                                   | 1                  | 2                  | 3                  | 4                  | 5                  | 6                  | 7                  | 8                  | 9                  | 10                 | 11                 |
|----------------------------------------|--------------------|--------------------|--------------------|--------------------|--------------------|--------------------|--------------------|--------------------|--------------------|--------------------|--------------------|
| Cell concentration (ml <sup>-1</sup> ) | 5× 10 <sup>8</sup> | 5× 10 <sup>8</sup> | 5× 10 <sup>8</sup> | 5× 10 <sup>8</sup> | 5× 10 <sup>8</sup> | 5× 10 <sup>8</sup> | 5× 10 <sup>8</sup> | 5× 10 <sup>8</sup> | 5× 10 <sup>8</sup> | 5× 10 <sup>7</sup> | 5× 10 <sup>9</sup> |
| Plug volume (μl)                       | 30                 | 30                 | 30                 | 30                 | 30                 | 30                 | 30                 | 15                 | 45                 | 30                 | 30                 |
| Incubation time (h)                    | 2                  | 2                  | 2                  | 2                  | 2                  | 1                  | 4                  | 2                  | 2                  | 2                  | 2                  |
| Cas9 concentration (mg/ml)             | 0.1                | 0.1                | 0.1                | 0.02               | 0.2                | 0.1                | 0.1                | 0.1                | 0.1                | 0.1                | 0.1                |
| sgRNA concentration (ng/μl each)       | 30                 | 10                 | 100                | 30                 | 30                 | 30                 | 30                 | 30                 | 30                 | 30                 | 30                 |

**Supplementary Figure 1 | Optimization of RNA-guided Cas9 cleavage reaction under different cell concentration, plug volume, incubation time, Cas9 concentration, and sgRNA concentration conditions.** Gel plugs containing *E. coli* chromosomes were digested by a pair of sgRNAs targeting a 50 kb genome segment (*E. coli-lacZ* 50 kb) under the indicated conditions (shown on the right) and analyzed by PFGE to assess the cleavage efficiency.

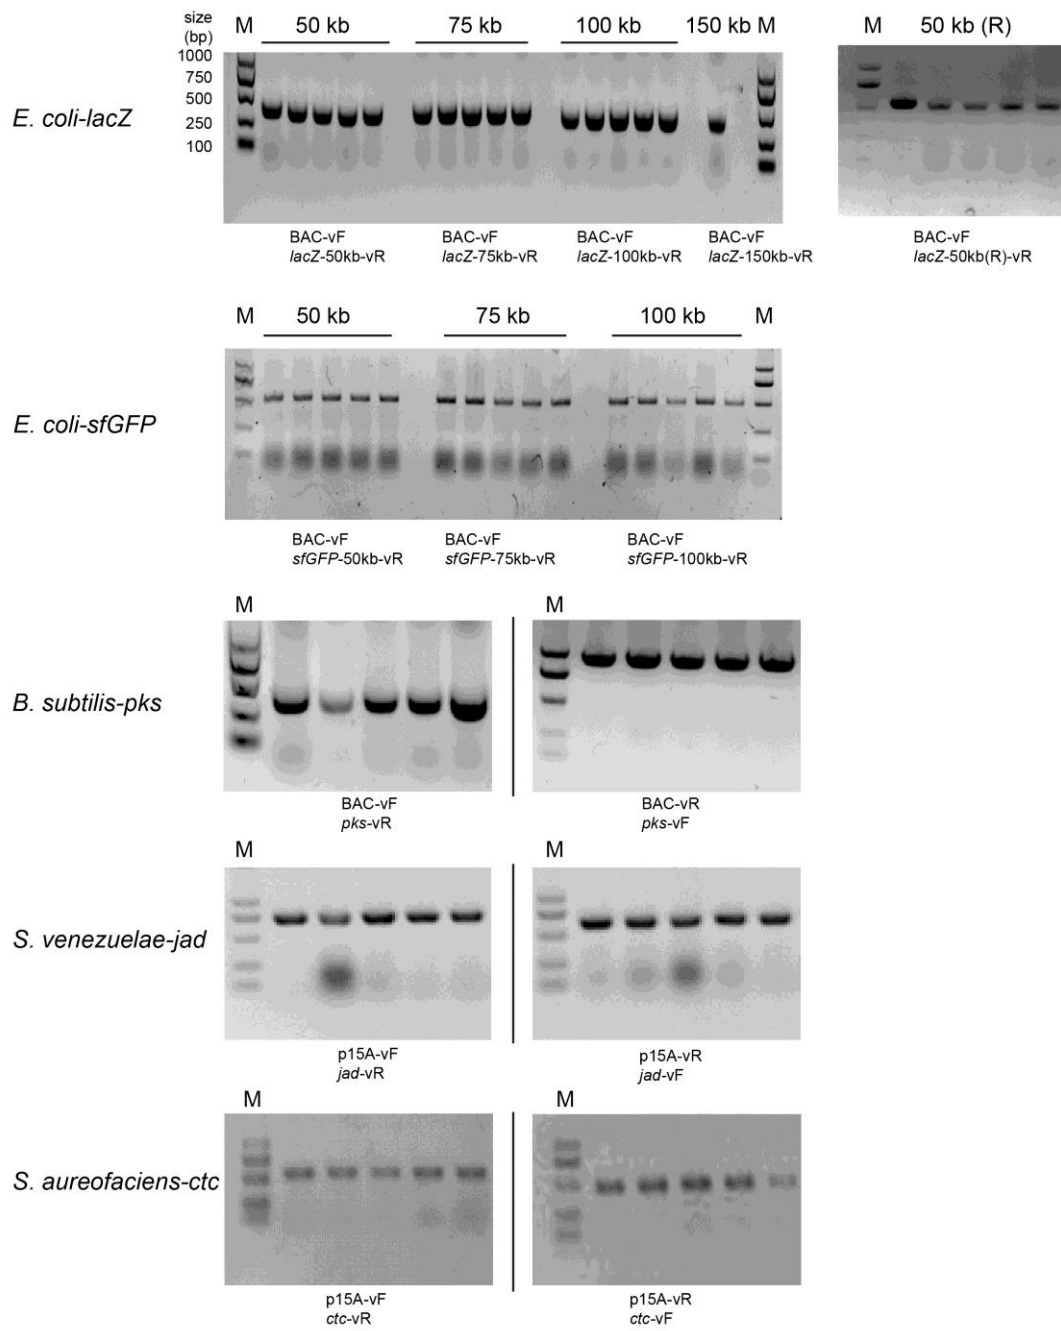

**Supplementary Figure 2 | PCR validation of positive clones carrying target inserts cloned from *E. coli*, *B. subtilis*, *S. venezuelae*, and *S. aureofaciens*, respectively.** For the blue or the green colonies with target inserts cloned from *E. coli*, PCR was performed at one of the two junction sites opposite to the *lacZ* or *sfGFP* gene, whereas for those from the others, both junction sites were PCR-validated. Names of the PCR primers used are listed below the panels. The same DNA marker was used in all panels. M, marker.

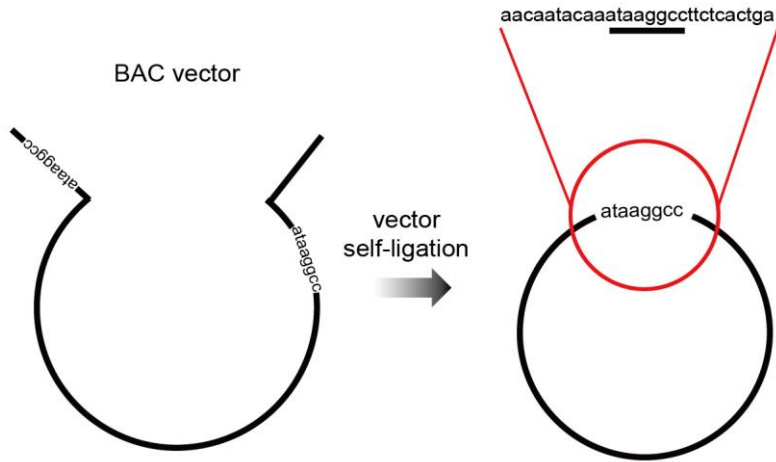

**Supplementary Figure 3** | An example of negative clones arising from vector self-ligation at sites with an identical sequence (left: prepared BAC vector with sites that shared 8 bp identical sequence; right: sequencing result of the self-ligation site).

## Supplementary Tables

**Supplementary Table 1. PCR primers used in this study.**

| sgRNA template primers       |                                                                           |
|------------------------------|---------------------------------------------------------------------------|
| sgRNA-F                      | 5'-GTTTTAGAGCTAGAAATAGCAAGTTAAAATAAGGCTAGTC-3'                            |
| sgRNA-R                      | 5'-<br>AAAAGCACCGACTCGGTGCCACTTTTTCAAGTTGATAACGGACTAGCCTTATTTTAAC<br>T-3' |
| <i>lacZ</i> -sgR1-P          | 5'-TAATACGACTCACTATAggtgctgatatctcggtagtGTTTTAGAGCTAGAAATAGCAA-3'         |
| <i>lacZ</i> -sgR2-P          | 5'-TAATACGACTCACTATAggtaggatcataaagtcctcGTTTTAGAGCTAGAAATAGCAA-3'         |
| <i>lacZ</i> -sgR3-P          | 5'-TAATACGACTCACTATAgaatctgtcgccgaagtaaaGTTTTAGAGCTAGAAATAGCAA-3'         |
| <i>lacZ</i> -sgR4-P          | 5'-TAATACGACTCACTATAgctgtcgggggtaattgctGTTTTAGAGCTAGAAATAGCAA-3'          |
| <i>lacZ</i> -sgR5-P          | 5'-TAATACGACTCACTATAgctgtttacctataatagtcGTTTTAGAGCTAGAAATAGCAA-3'         |
| <i>lacZ</i> -sgR6-P          | 5'-TAATACGACTCACTATAgtaaatctggggatggcgctGTTTTAGAGCTAGAAATAGCAA-3'         |
| <i>lacZ</i> -sgR7-P          | 5'-TAATACGACTCACTATAgggagggcggtttgcgtatt GTTTTAGAGCTAGAAATAGCAA-3'        |
| <i>lacZ</i> -sgR8-P          | 5'-TAATACGACTCACTATAgtgagaaatcgatTTTTgatGTTTTAGAGCTAGAAATAGCAA-3'         |
| <i>sfGFP</i> -sgR1-P         | 5'-TAATACGACTCACTATAgtaagttgatctggagaaaGTTTTAGAGCTAGAAATAGCAA-3'          |
| <i>sfGFP</i> -sgR2-P         | 5'-TAATACGACTCACTATAgtctcgccaaactggaaaaGTTTTAGAGCTAGAAATAGCAA-3'          |
| <i>sfGFP</i> -sgR3-P         | 5'-TAATACGACTCACTATAgccattccgctgcgctcgaGTTTTAGAGCTAGAAATAGCAA-3'          |
| <i>sfGFP</i> -sgR4-P         | 5'-TAATACGACTCACTATAgctgacatcgtccagctgaGTTTTAGAGCTAGAAATAGCAA-3'          |
| <i>sfGFP</i> -sgR5-P         | 5'-TAATACGACTCACTATAggaactatcaacttttgctGTTTTAGAGCTAGAAATAGCAA-3'          |
| <i>sfGFP</i> -sgR6-P         | 5'-TAATACGACTCACTATAgcaatcctgtgtgtctgacGTTTTAGAGCTAGAAATAGCAA-3'          |
| <i>pks</i> -sgR1-P           | 5'-TAATACGACTCACTATAgtaaacagctgcaatccatGTTTTAGAGCTAGAAATAGCAA-3'          |
| <i>pks</i> -sgR2-P           | 5'-TAATACGACTCACTATAgcctatgagattcctttattGTTTTAGAGCTAGAAATAGCAA-3'         |
| <i>jad</i> -sgR1-P           | 5'-TAATACGACTCACTATAggcgaagtccttgccatgatgGTTTTAGAGCTAGAAATAGCAA-3'        |
| <i>jad</i> -sgR2-P           | 5'-TAATACGACTCACTATAggacgacgaggatccgacctgaGTTTTAGAGCTAGAAATAGCAA-3'       |
| <i>ctc</i> -sgR1-P           | 5'-TAATACGACTCACTATAggaccaccggaggacttcgcaGTTTTAGAGCTAGAAATAGCAA-3'        |
| <i>ctc</i> -sgR2-P           | 5'-TAATACGACTCACTATAggtctccaccgtctaccgacGTTTTAGAGCTAGAAATAGCAA-3'         |
| Vector amplification primers |                                                                           |
| <i>lacZ</i> -BAC-F           | 5'-tgagctgtcttcggtatcgtcgtatcccactttattatcacTTATTCAGGCGTAGCAAC-3'         |
| <i>lacZ</i> -50kb(R)-BAC-F   | 5'-cggccaacgcgcggggagagggcgtttgcgtttattatcacTTATTCAGGCGTAGCAAC-3'         |

|                            |                                                                      |
|----------------------------|----------------------------------------------------------------------|
| <i>lacZ</i> -50kb-BAC-R    | 5'-gacatgccaaaagagtggacaacgacccgagGCGGCCGCATCGAATATAA-3'             |
| <i>lacZ</i> -50kb(R)-BAC-R | 5'-ttctttatctgtcagtgagaaatcgattttGCGGCCGCATCGAATATAA-3'              |
| <i>lacZ</i> -75kb-BAC-R    | 5'-gccgttcaaatctaactcgttaattaccctttGCGGCCGCATCGAATATAA-3'            |
| <i>lacZ</i> -100kb-BAC-R   | 5'-agcaacgactgatagtagtatcttccccagcGCGGCCGCATCGAATATAA-3'             |
| <i>lacZ</i> -150kb-BAC-R   | 5'-ttttgtgccaccagatttgcgccgcccagcGCGGCCGCATCGAATATAA-3'              |
| <i>lacZ</i> -200kb-BAC-R   | 5'-ccaggtctccgtaaccgagcgagccccagcGCGGCCGCATCGAATATAA-3'              |
| <i>sfGFP</i> -BAC-F        | 5'-ctgttaaaaaacgattataaaatttccctttttattatcacTTATTCAGGCGTAGCAAC-3'    |
| <i>sfGFP</i> -50kb-BAC-R   | 5'-tatgtggattaatcagatgtgtttgccatttGCGGCCGCATCGAATATAA-3'             |
| <i>sfGFP</i> -75kb-BAC-R   | 5'-cggcgcagaaccgagtacatcacggccatcgGCGGCCGCATCGAATATAA-3'             |
| <i>sfGFP</i> -100kb-BAC-R  | 5'-aaaaagattgatgcgattataaaacccttcaGCGGCCGCATCGAATATAA-3'             |
| <i>sfGFP</i> -150kb-BAC-R  | 5'-aacgtcgaagatggtcgtttcgttcccagcGCGGCCGCATCGAATATAA-3'              |
| <i>sfGFP</i> -200kb-BAC-R  | 5'-gggcaatgaaaaaatgccagggtacctgtcGCGGCCGCATCGAATATAA-3'              |
| <i>pks</i> -BAC-F          | 5'-gttttcttggatgaatgaagctcacctaatttattatcacTTATTCAGGCGTAGCAAC-3'     |
| <i>pks</i> -BAC-R          | 5'-taccgaggagcctcagcgaccgcagccatgGCGGCCGCATCGAATATAA-3'              |
| <i>jad</i> -p15A-F         | 5'- agtgccacaagcgtctaggggagctccacatGGTGAAGATCCTTTTTGATAATCTCATG -3'  |
| <i>jad</i> -p15A-R         | 5'- cggcggaggtgccgtggaagccgggcccgtcaTAGATCCTTTTTGGTTCATGTGCAGCTC -3' |
| <i>ctc</i> -p15A-F         | 5'- gcctctggccggccgggaaagcagccatgcGGTGAAGATCCTTTTTGATAATCTCATG 3'    |
| <i>ctc</i> -p15A-R         | 5'- gcaggtgggtgaggggtgcggatcccgtcTAGATCCTTTTTGGTTCATGTGCAGCTC-3'     |
| Validation primers         |                                                                      |
| BAC-vF                     | 5'-agtccgagctcatcgctaat-3'                                           |
| BAC-vR                     | 5'-ggatagtgttacccttgttaca-3'                                         |
| <i>lacZ</i> -50kb-vR       | 5'-gcattttgattcacagcagtc-3'                                          |
| <i>lacZ</i> -50kb(R)-vR    | 5'-ggtgacgctcatcatggtt-3'                                            |
| <i>lacZ</i> -75kb-vR       | 5'-gacgataaccttagaggatgat-3'                                         |
| <i>lacZ</i> -100kb-vR      | 5'-cgagctttaatgcctctgct-3'                                           |
| <i>lacZ</i> -150kb-vR      | 5'-attcctgtgccttaatgacaat-3'                                         |
| <i>sfGFP</i> -50kb-vR      | 5'-gcattctgtttcacacgacga-3'                                          |
| <i>sfGFP</i> -75kb-vR      | 5'-gcagggtctgtttacgcca-3'                                            |
| <i>sfGFP</i> -100kb-vR     | 5'-ttgtccgcgcttctcta-3'                                              |
| <i>pks</i> -vF             | 5'-ccatacaatcatcgatcgggt-3'                                          |

|                |                                |
|----------------|--------------------------------|
| <i>pks</i> -vR | 5'-ccctccatccctcgttetaa-3'     |
| p15A-vF        | 5'-gagtccaacccggtaagacacgac-3' |
| p15A-vR        | 5'- gagcgtccctcccggacc-3'      |
| <i>jad</i> -vF | 5'-acggacgagatccacacgg-3'      |
| <i>jad</i> -vR | 5'-tcgcctggcctggacag-3'        |
| <i>ctc</i> -vF | 5'- gaccgagagcgcggccacc-3'     |
| <i>ctc</i> -vR | 5'- tggcgacaggcgcgagtga-3'     |

**Supplementary Table 2. Quantitative results and positive rates of the performed CATCH cloning experiments.**

| Target                         | Vector  | Trial | # of positive colonies | # of total colonies | Positive rate | Average positive rate $\pm$ s.d. |
|--------------------------------|---------|-------|------------------------|---------------------|---------------|----------------------------------|
| <i>E. coli-lacZ</i> 50 kb      | pCC1BAC | 1     | 31                     | 47                  | 66.0%         | 65.8 $\pm$ 4.0%                  |
|                                |         | 2     | 23                     | 33                  | 69.7%         |                                  |
|                                |         | 3     | 29                     | 47                  | 61.7%         |                                  |
| <i>E. coli-lacZ</i> 50 kb (R)  | pCC1BAC | 1     | 25                     | 42                  | 59.5%         | 62.2 $\pm$ 9.6%                  |
|                                |         | 2     | 19                     | 35                  | 54.2%         |                                  |
|                                |         | 3     | 35                     | 48                  | 72.9%         |                                  |
| <i>E. coli-lacZ</i> 75 kb      | pCC1BAC | 1     | 8                      | 22                  | 36.4%         | 35.1 $\pm$ 1.6%                  |
|                                |         | 2     | 11                     | 31                  | 35.5%         |                                  |
|                                |         | 3     | 5                      | 15                  | 33.3%         |                                  |
| <i>E. coli-lacZ</i> 100 kb     | pCC1BAC | 1     | 8                      | 24                  | 33.3%         | 21.5 $\pm$ 11.2%                 |
|                                |         | 2     | 3                      | 15                  | 20.0%         |                                  |
|                                |         | 3     | 8                      | 35                  | 22.9%         |                                  |
| <i>E. coli-lacZ</i> 150 kb     | pCC1BAC | 1     | 0                      | 30                  | 0             | N/A                              |
|                                |         | 2     | 0                      | 23                  | 0             |                                  |
|                                |         | 3     | 1                      | 51                  | 1.9%          |                                  |
| <i>E. coli-lacZ</i> 200 kb     | pCC1BAC | 1     | 0                      | 10                  | 0             | N/A                              |
|                                |         | 2     | 0                      | 23                  | 0             |                                  |
|                                |         | 3     | 0                      | 17                  | 0             |                                  |
| <i>E. coli-sfGFP</i> 50 kb     | pCC1BAC | 1     | 24                     | 58                  | 41.3%         | 55.2 $\pm$ 12.4%                 |
|                                |         | 2     | 32                     | 49                  | 65.3%         |                                  |
|                                |         | 3     | 20                     | 34                  | 58.8%         |                                  |
| <i>E. coli-sfGFP</i> 75 kb     | pCC1BAC | 1     | 12                     | 29                  | 41.3%         | 39.2 $\pm$ 6.4%                  |
|                                |         | 2     | 8                      | 25                  | 32.0%         |                                  |
|                                |         | 3     | 15                     | 34                  | 44.1%         |                                  |
| <i>E. coli-sfGFP</i> 100 kb    | pCC1BAC | 1     | 5                      | 24                  | 20.8%         | 21.6 $\pm$ 7.4%                  |
|                                |         | 2     | 7                      | 48                  | 14.6%         |                                  |
|                                |         | 3     | 10                     | 34                  | 29.4%         |                                  |
| <i>E. coli-sfGFP</i> 150 kb    | pCC1BAC | 1     | 0                      | 23                  | 0             | N/A                              |
|                                |         | 2     | 0                      | 38                  | 0             |                                  |
|                                |         | 3     | 0                      | 28                  | 0             |                                  |
| <i>E. coli-sfGFP</i> 200 kb    | pCC1BAC | 1     | 0                      | 25                  | 0             | N/A                              |
|                                |         | 2     | 0                      | 36                  | 0             |                                  |
|                                |         | 3     | 0                      | 48                  | 0             |                                  |
| <i>B. subtilis-pks</i> 78 kb   | pCC1BAC | 1     | 4                      | 25                  | 16.0%         | 12.2 $\pm$ 3.7%                  |
|                                |         | 2     | 3                      | 35                  | 8.6%          |                                  |
|                                |         | 3     | 5                      | 42                  | 11.9%         |                                  |
| <i>S. venezuelae-jad</i> 36 kb | p15A    | 1     | 55                     | 57                  | 96.5%         | 90.5 $\pm$ 6.1%                  |
|                                |         | 2     | 60                     | 66                  | 90.9%         |                                  |
|                                |         | 3     | 64                     | 76                  | 84.2%         |                                  |
| <i>S. aureofaciens-ctc</i> 32  | p15A    | 1     | 68                     | 72                  | 94.4%         | 90.8 $\pm$ 3.7%                  |

|    |  |   |    |    |       |  |
|----|--|---|----|----|-------|--|
| kb |  | 2 | 70 | 77 | 90.9% |  |
|    |  | 3 | 74 | 85 | 87.1% |  |



**Supplementary Table 3. Target sequences used in CATCH cloning, including the PAM motifs.**

| sgRNA              | Target sequence + PAM sequence<br>(capital characters: NGG) | Location of PAM       |
|--------------------|-------------------------------------------------------------|-----------------------|
| <i>lacZ</i> -sgR1  | ggtgcggatatctcggtagtGGG                                     | target genome segment |
| <i>lacZ</i> -sgR2  | ggtaggatcataaagtcctcGGG                                     | target genome segment |
| <i>lacZ</i> -sgR3  | gaatctgtcgccgaagtaaaGGG                                     | target genome segment |
| <i>lacZ</i> -sgR4  | gctgtcggggggaatttgcTGGG                                     | target genome segment |
| <i>lacZ</i> -sgR5  | gctgtttacctataatagtcGGG                                     | target genome segment |
| <i>lacZ</i> -sgR6  | gtaaactctggggatggcgtGGG                                     | target genome segment |
| <i>lacZ</i> -sgR7  | ggagaggcggtttgcgtattGGG                                     | flanking sequence     |
| <i>lacZ</i> -sgR8  | gctgaccgggctgaacttcGGG                                      | flanking sequence     |
| <i>sfGFP</i> -sgR1 | gtaagttgtatctggagaaaGGG                                     | target genome segment |
| <i>sfGFP</i> -sgR2 | gtctcgccaaactggaaaaTGG                                      | target genome segment |
| <i>sfGFP</i> -sgR3 | gccattccgctgcgctcgaTGG                                      | target genome segment |
| <i>sfGFP</i> -sgR4 | gcggacatcgtccagctgaAGG                                      | target genome segment |
| <i>sfGFP</i> -sgR5 | ggaactatcaacttttgcTGGG                                      | target genome segment |
| <i>sfGFP</i> -sgR6 | gcaatcctgttgtctgacAGG                                       | target genome segment |
| <i>pks</i> -sgR1   | gtaaacagctgcaatccatGGG                                      | target genome segment |
| <i>pks</i> -sgR2   | gcctatgagattccttattGGG                                      | target genome segment |
| <i>jad</i> -sgR1   | cgaagtccttgccatgatTGG                                       | target genome segment |
| <i>jad</i> -sgR2   | acgacgaggatccgacctgaCGG                                     | target genome segment |
| <i>ctc</i> -sgR1   | accaccggaggacttcgcaTGG                                      | target genome segment |
| <i>ctc</i> -sgR2   | tctccaccgtctaccgcgacGGG                                     | target genome segment |
